# Supplementary material for: Elucidation of Prebiotics, Probiotics, Postbiotics, and Target from Gut Microbiota to Alleviate Obesity via Network Pharmacology Study
Source: Cells. 2022 Sep 16;11(18):2903. doi: 10.3390/cells11182903 (PMC9496669; doi:10.3390/cells11182903)
Supplement: Supplementary file 1 [file cells-11-02903-s001.zip › Supplementary Table S1.xlsx]

## Sheet: Sheet1
The number of 1256 targets from SEA	The number of 947 targets from STP	The numner of 668 overlapping targets between SEA and STP	The number of 3028 obesity-related targets	The number of 342 final targets
CES2	HDAC3	CES2	MC4R	CES2
CES1	EGLN1	CES1	PPARG	CES1
PLA2G5	SLC6A1	PLA2G5	POMC	PLA2G5
SLC22A8	GABRA1	XDH	CPE	XDH
XDH	GABRA3	CYP1B1	AGRP	CYP1B1
CYP1B1	GABRA2	NOX4	SH2B1	NOX4
NOX4	GABBR2	TNKS	LEP	TNKS
TNKS	GABRR1	GLO1	LEPR	GLO1
GLO1	SLC6A11	ABCG2	PCSK1	ABCG2
ABCG2	SLC22A6	AKR1B10	ENPP1	ALOX5
AKR1B10	SLC6A13	ALOX5	SIM1	TTR
ALOX5	GABRB2	TNKS2	UCP3	AKR1B1
TNKS2	GABRG2	TTR	NR0B2	CA4
TTR	GABBR1	AKR1B1	BBS4	APP
AKR1B1	NOX4	CA4	MKKS	MAOA
CA4	AKR1B1	APP	BBS1	ALOX15
APP	CDK5R1	MAOA	CNR1	GPR35
MAOA	XDH	ALOX15	CRP	CD38
ALOX15	MAOA	CA7	ESR1	MMP12
CA7	FLT3	GPR35	SIRT3	FLT3
GPR35	CA2	CD38	SIRT1	PARP1
CD38	CCNB3	CA12	HSD11B1	CYP1A2
CA12	ALOX5	CSNK2A2	IL6	MMP9
CSNK2A2	ADORA1	MMP12	IRS1	GSK3B
CSNK2B	CA7	FLT3	LBP	MMP2
MMP12	GLO1	PARP1	LPL	PTPRS
FLT3	APP	CYP1A2	CCL2	PGF
PARP1	SYK	MMP9	ADIPOQ	AMY1A
CYP1A2	GSK3B	GSK3B	ICAM1	ABCB1
MMP9	PARP1	CA2	CYP2E1	PON1
GSK3B	TTR	MMP2	F2	ST6GAL1
CA2	MMP9	PTPRS	PMCH	CYP1A1
DPP4	CA12	PGF	ACSL1	CBR1
MMP2	MMP2	AMY1A	FOXO3	SNCA
CREB1	CA4	MPG	GPX3	ESR2
PTPRS	MMP12	ABCB1	HK2	ALOX12
ELAVL3	CD38	PON1	NPY5R	NMUR2
P4HB	CYP1B1	ST6GAL1	CD40	VEGFA
PGF	ABCG2	CYP1A1	HADH	IL2
CBS	AKR1B10	CBR1	ADRB2	AHR
AMY1A	TNKS2	QDPR	ADRB3	ESR1
KCND3	TNKS	TERT	GLUL	RPS6KA3
MPG	TOP1	ABCC1	APOE	MPO
ANTXR2	ARG1	SNCA	INS	CA3
ABCB1	PTPRS	DAPK1	NPY1R	AR
PON1	ABCC1	ESR2	GHRL	HSD17B1
ST6GAL1	HSD17B1	NEK6	INPP5E	MAPT
CYP1A1	ACHE	ALOX12	TF	GPBAR1
CBR1	CDK6	NMUR2	FTO	G6PD
QDPR	ABCB1	GRK6	NEIL1	NPC1L1
TERT	HSD17B2	CALM1	CARTPT	SERPINA6
ABCC1	CYP19A1	VEGFA	ADCY3	NR1H4
SNCA	ESR2	KDM4E	GNAS	SHBG
DAPK1	ADORA2A	CCR4	NPC1	ENPP2
CYP2C8	CSNK2A1	IL2	PRKAR1A	FGF1
ESR2	ALOX15	AHR	AHR	EPHB2
NEK6	ALOX12	ESR1	SDCCAG8	GRIN1
ALOX12	ESR1	RPS6KA3	MYT1L	NR3C1
NMUR2	PTGS2	MPO	NTRK2	NR1H3
GRK6	CFTR	CA3	SDC3	LIPA
ELAVL1	AMY1A	ODC1	KCNMA1	SRD5A1
CALM1	GRK6	PKN1	RAI1	VDR
VEGFA	CA1	AR	MRAP2	NR3C2
GSTO1	CA9	NUAK1	BBS9	CISD1
ALPI	CDK2	TYR	BBS2	FGF2
KDM4E	TERT	HSD17B1	VPS13B	CYP17A1
CCR4	CDK1	NAE1	AFF4	OXER1
IL2	TYR	CDK5R1	HOXB5	FAAH
AHR	AHR	MAPT	PACS1	FABP3
ESR1	ESRRA	HSD17B2	BBS10	THRA
RPS6KA3	GPR35	GPBAR1	PHF6	THRB
MPO	AVPR2	SLC10A2	NAMPT	SELP
CA3	IGF1R	G6PD	TTC8	IGFBP3
ODC1	EGFR	ATP12A	TMEM18	IGFBP1
PKN1	F2	CDC45	BBS5	IGFBP2
AR	PIM1	NPC1L1	GNPDA2	TH
NUAK1	AURKB	SERPINA6	BBS12	SLC22A12
TYR	DRD4	CDC25A	DPYD	CXCL8
HSD17B1	MPO	NR1H4	RMST	SELE
NAE1	PIK3R1	CA1	AKT1	YWHAG
CDK5R1	DAPK1	SHBG	FAAH	PAM
MAPT	PYGL	ABCB11	FASN	ESRRG
HSD17B2	SRC	UGT2B7	NEGR1	FYN
GPBAR1	PTK2	SRD5A2	FGF21	FFAR1
SLC10A2	KDR	EPHA7	GCG	CA5A
SLC10A1	MMP13	ENPP2	GH1	KCNMA1
G6PD	MMP3	EPHA5	GNB3	SERPINE1
ATP12A	CA3	EPHA8	HCRT	FFAR4
ST3GAL1	PLK1	EPHB3	HTR2C	PLA2G4A
ABCC4	CA6	FGF1	IGF2	CYP26B1
CDC45	PKN1	EPHA4	AQP7	SLC15A1
DHCR24	CA14	RORA	LDLR	HCAR2
NPC1L1	MET	EPHA1	MC3R	SLC22A6
SERPINA6	NEK2	EPHB1	MMP9	CMA1
NPC1	CXCR1	POLA1	SERPINE1	GSR
CD4	CAMK2B	EPHA6	ANGPTL4	HSPA1A
CDC25A	ALK	EPHB2	PLIN1	PDE4B
CRYAB	AKT1	GRIN1	PPARA	ESRRB
NR1H4	NEK6	NR3C1	PPARD	ENPEP
SLCO4C1	PLA2G1B	NR1H3	MKS1	LNPEP
CA1	CA5A	LIPA	BBS7	GLI1
SHBG	BACE1	GABRB2	PRKCH	ANPEP
ABCB11	AXL	SRD5A1	PYY	MIF
GRIN2C	NUAK1	EPHA3	PTPN1	ACE
GRIN2D	AKR1C2	VDR	TNF	PDE4D
UGT2B7	AKR1C1	EPHA2	UCP1	NR4A1
GABRD	AKR1C3	NR3C2	UCP2	CSK
SRD5A2	AKR1C4	FOLH1	PNPLA3	MET
EPHA7	CA13	CISD1	ARL6	ALDH2
ENPP2	AKR1A1	HSD17B3	TBC1D1	MME
EPHA5	PFKFB3	FGF2	HTR2A	CASP1
EPHA8	PLG	CDC25B	BCHE	PPARD
EPHB3	KDM4E	CYP17A1	TUB	MMP3
FGF1	AR	GABRA1	KCTD15	ACE2
EPHA4	CDK5	GABRG2	HSPA5	TAAR1
RORA	CCNB1	SLC25A20	MIR21	S1PR2
EPHA1	CCNB2	OXER1	CIDEA	MGLL
EPHB1	NR1H4	FAAH	PPARGC1B	ADRB3
POLA1	GPBAR1	FABP3	ADRB1	CFTR
EPHA6	POLB	GPR18	MTCH2	BRS3
EPHB2	VDR	IGFBP5	GCK	ADAM12
GRIN2B	HSD11B1	CTBP2	PTGS2	GPR84
GRIN1	UGT2B7	SELL	SREBF1	CTSL
NR3C1	SERPINA6	THRA	ALMS1	MMP14
NR1H3	SHBG	THRB	FGFR1	MMP15
EPHB6	HSD17B3	PLAA	SAT1	MMP1
LIPA	G6PD	SELP	TNFRSF1B	STS
GABRB2	CDC25A	IGFBP3	NR1I3	AKR1C2
SRD5A1	PPARA	IGFBP1	CTSS	GART
EPHA3	PPARD	IGFBP2	CYP1B1	PLA2G2A
VDR	NPC1L1	IGFBP4	HMOX1	PIN1
EPHA2	FABP2	IGFBP6	MIR34A	CAPN1
SREBF2	HSD11B2	TH	STS	SLC19A1
NR3C2	PTGER2	SLC7A5	SOD1	CAPN2
FOLH1	FNTA	SLC22A12	TRPV1	PTPRC
CISD1	PTGFR	ALPG	NR1I2	CTSB
CTDSP1	FABP4	CXCL8	CD163	HLA-A
HSD17B3	FABP3	SELE	CD68	CCKBR
FGF2	FABP5	DNM1	CES1	STAT3
CDC25B	FFAR1	YWHAG	KSR2	GSTK1
CYP17A1	KDM5C	FUT7	ACACB	CTSK
GABRA1	PTPN1	EZR	IGFBP2	CASP3
GABRA4	CDC45	PAM	NHLH2	P2RY12
GABRG2	HAO1	CA14	SOD2	KLK3
LPAR4	KDM2A	DBH	CTF1	F2
SLC25A20	PTGES	ESRRG	OGG1	F10
LPAR6	TBXA2R	CA5B	PCK1	PTPN2
OXER1	PTGDR	CA6	RAPGEF3	OPRD1
LPAR2	SAE1	AKR1C4	GPX1	HDAC8
POLH	PHF8	FYN	ITGAM	PCSK7
LPAR3	PTPRC	P4HTM	ACHE	PPARG
POLK	CACNA2D1	HDAC1	SLC22A1	PTPN1
FAAH	THRA	APEX1	VLDLR	PPARA
LPAR1	THRB	JUN	CEBPA	CASP8
FABP3	TNF	FFAR1	ADH1B	CTSS
GPR18	GSTK1	CA5A	PARP1	PLG
IGFBP5	SLC6A12	KCNMA1	CS	GHSR
ERCC1	PTGER3	PTGER4	DDIT3	PLAU
ERCC4	HMGCR	SERPINE1	ZNF169	OPRM1
CTBP2	PDE5A	FFAR4	FCGR3B	CPB2
SELL	MDM2	CPA3	FTL	AVPR1A
THRA	GRM5	PLA2G4A	IDO1	PSENEN
THRB	NR1I3	CYP26B1	MIR130B	SIRT1
PLAA	STS	MMP10	MRC1	APH1A
AGBL2	CTSA	SLC15A1	PFKFB3	PSEN1
SELP	PTGDR2	HCAR2	PRKAR2B	SIRT3
GALE	AMPD2	SLC22A6	TFRC	HDAC2
IGFBP3	AGTR1	TBXAS1	CA3	CCKAR
MYOC	ITGAV	CMA1	AKR1C3	HDAC6
IGFBP1	TLR9	LTB4R	ALDH1L1	HDAC11
IGFBP2	PLA2G4A	MMP8	PPARGC1A	SIRT2
IGFBP4	EDNRB	S1PR1	LACTB	MTNR1B
IGFBP6	EDNRA	CPA1	COX7C	ATIC
TH	ITGB3	GSR	CPB2	UTS2R
SLC7A5	UBA2	DAO	APCDD1	MAPK8
SLC22A12	FNTB	HSPA1A	PPM1L	FDFT1
ALPG	NR1H3	ABAT	CYB5A	F13A1
CXCL8	CDC25B	PDE4B	ACE	HDAC3
SELE	ALOX5AP	ESRRB	NQO1	CPN1
SLC13A5	CES2	ENPEP	DRD2	BCHE
DNM1	CPT1A	LNPEP	ECHS1	PLAT
RPS6KB2	PPP5C	PLEC	ABCA1	SSTR4
YWHAG	PPP1CA	GLI1	EFNB1	ESRRA
FUT7	CCKBR	ANPEP	EP300	CYP19A1
EZR	PTGER1	MIF	ESR2	DRD5
PAM	SLC22A12	MDM4	ETFDH	AKR1C3
CA14	RBP4	ACE	RAB21	ACHE
DBH	PDE3A	PDE4D	ZFR2	QPCTL
ESRRG	PDE3B	NR4A1	MTOR	NFE2L2
CA5B	OXER1	PARP10	GFPT1	TRPV1
CA6	PSEN2	CSK	GIP	ERN1
AKR1C4	PDF	MET	GLP1R	FABP4
FYN	MME	GRIA1	MCHR1	EP300
GSTA1	CNR2	SLC6A11	NR3C1	DRD1
FOS	CMA1	ALDH2	HMGB2	ADRB2
P4HTM	ITGB1	MMP13	ACADM	SLC5A1
HDAC1	ACE	CDC25C	IFNG	SLC5A2
APEX1	TBXAS1	MME	IL1B	PDK1
JUN	IMPDH2	PTGFR	IL10	SSTR2
FFAR1	GSR	PTGER2	IL18	HTR1D
CA5A	PDE4A	PTGER3	LCN2	HTR1B
KCNMA1	PDE4B	CASP1	LIPE	EDNRA
SOAT1	PDE4C	PHF8	MIR130A	HTR1A
PTGER4	CTSG	KDM2A	MIR184	DRD4
CXCL12	DHFR	RARB	ME1	HTR2A
SERPINE1	SLC25A20	PPARD	ALDH6A1	HTR2C
YARS1	LTB4R	MMP3	MMUT	DRD2
FFAR4	HIF1A	AKR1C1	ZFHX3	SLC6A4
GPR17	CPT1B	ACE2	ACLY	HTR2B
CPA3	CASP1	TAAR1	NOS3	HTR6
PLA2G4A	PTGIR	GABBR2	NPY	EDNRB
CYP26B1	DUSP3	S1PR2	NPY2R	PRKAB1
MMP10	ECE1	MGLL	NUCB2	ADCY5
SLC15A1	CYP26A1	CYP26A1	ZBTB7B	AKT1
S1PR5	PIN1	GABBR1	ADIPOR1	ALB
MMEL1	TRPA1	ADRB3	DCXR	IMPDH1
HCAR2	PTGS1	NQO2	ACP5	PTPN6
SLC22A6	ELANE	GAA	CYCS	NR0B2
TBXAS1	PSENEN	CFTR	FGGY	MAOB
CMA1	NCSTN	FABP1	CYP26B1	PTPN11
NAALAD2	APH1A	BRS3	RARRES2	BACE1
LTB4R	PSEN1	ECE1	RBP4	EGFR
MMP8	APH1B	ADAM12	SCD	F3
S1PR1	ITGA2	GPR84	ATPAF1	ALPL
CPA1	ITGA4	CTSL	SLC22A3	KDM6B
GSR	YWHAG	MMP14	SLC22A2	IL6ST
S1PR3	MMP1	HTR1E	STAT3	FTO
DAO	TPMT	MMP15	TGFB1	AOC3
HSPA1A	CNR1	MMP1	TLR4	EGLN1
RHOA	FYN	STS	UQCRC2	FDPS
SLC22A1	LCK	CA9	ADIPOR2	TBXA2R
USP4	COMT	SLCO1B1	AKAP1	KDM4C
ALDH5A1	KDM4A	AKR1C2	CASP1	HDAC4
USP5	KDM3A	FURIN	GAS7	NR1H2
ABAT	KDM6B	GART	PEX11A	PTGS1
AOC2	FTO	PLA2G2A	SUCLG2	CYP2D6
MB	KDM4C	SLC46A1	SUCLA2	HCAR3
SLC6A5	GRIK1	PIN1	APLN	PTGS2
PDE4B	MIF	CAPN1	WNT3A	ACP1
DNTT	CXCL8	FCER2	SOCS3	IL6
ESRRB	KCNN4	SLC19A1	SLC16A7	HIF1A
ENPEP	CPA1	DLG4	CD36	GFPT1
LNPEP	SLC6A2	FOLR2	ENTPD6	NOS2
TAS2R14	CPA3	FOLR1	SIRT6	ARG1
PLEC	CYP1A2	GNPAT	SERPINF1	NOS3
GLI1	TH	LTA4H	CPT1A	NOS1
ANPEP	PTPRA	LAP3	SERPINA12	SLC6A12
MIF	NQO2	CAPN2	DRD4	KDM3A
G6PC	CA5B	KLK2	STK11	CHRNB4
MDM4	PTPN22	PRSS1	CCKAR	CHRNA3
ACE	IDO1	ITGB1	NR1H4	DYRK1B
PDE4D	DLG4	SLC1A1	HP	PFKFB3
ERAP2	CPB1	ITGA4	RPS6KB1	CREBBP
NR4A1	FURIN	PTPRC	NMU	MCL1
CELA1	APEX1	DHFR	GOT2	HNF4A
PARP10	ADAM12	ITGA2B	LIPC	CAMKK2
MEP1B	PARP15	PSMB5	PRKCB	ACLY
PLA2G4B	PARP10	CTSB	C3	NAAA
PCNA	ACE2	HLA-A	CDKN2A	PREP
CSK	PTK2B	ITGB3	CST3	BCL2A1
MET	CXCR2	CCKBR	AKT2	CYP2C9
SLC28A3	RPS6KB1	KYNU	IGFBP3	NPY5R
GABRQ	EPHX2	CBX7	AR	CASR
TAAR5	GRM4	STAT3	NMB	PDE5A
GRIA1	CAPN1	GSTK1	PNLIP	CD81
HMOX1	CTSD	CTSK	CCL5	COMT
IL1B	NOTUM	SLC1A2	ANGPTL6	CDK5
SLC6A11	HSPA1A	KLK1	CAV1	NLRP3
ALDH2	EPHA2	TGM2	MFN2	CDK6
CHRND	AURKA	CASP3	NR1H3	CYP3A4
SCNN1A	DYRK1A	TYMS	HRH3	GLI2
MMP13	LTA4H	FNTB	CRH	AKR1A1
CDC25C	HLA-A	FNTA	ANKRD26	PRKD1
MME	CHRM1	P2RY12	NNT	IDO1
PTGFR	GYS1	RNPEP	GUCY2C	NOX1
PTGER2	KDM2B	KLK3	JAK2	CHEK1
PTGER3	PDE8B	F2	ASIP	CCR2
CASP1	PTPsigma	F10	NPPB	PTPRF
ERAP1	PDE9A	PYGL	PRLH	CYP2A6
PHF8	GRK2	PTPN2	BCL2	PRKCB
KDM2A	CREBBP	OPRD1	SNAP25	PRKCH
RARB	PARP2	HDAC8	TSC1	SGK1
PPARD	KDM5A	PCSK7	AOC3	MAPK9
MMP3	KDM5B	PTPRA	SOCS1	GABRA6
AKR1C1	SLC1A1	FPGS	ALOX12	IMPDH2
ACE2	RNPEP	ITGAV	GAPDH	SLC6A3
TAAR1	CBX7	PPARG	GLRX	SLC6A2
GABBR2	TYK2	SIGMAR1	HK1	CDK1
S1PR2	SLCO1B1	PSMB2	IGF1R	SMARCA2
MGLL	KDM4D	ICMT	SLC27A1	PLA2G7
CYP26A1	ITGAL	PTPN1	FADS1	GABRA2
GABBR1	DHODH	PPARA	NOS1	GABRA3
ADRB3	SLC16A3	CASP8	PON2	ADRB1
NQO2	MAP3K8	CTSS	PRKG1	NAMPT
GAA	FABP1	CTRC	SREBF2	CHRNA4
KIF20A	PDE7A	PLG	NR1H2	CCR9
CFTR	BCAT2	GHSR	XDH	HSP90AA1
NMBR	P4HTM	HMGCR	CRHBP	CYP24A1
FABP1	PYGM	CTSG	DCN	HSP90B1
BRS3	PDE4D	PLAU	CFD	PTGES
PRKAB2	ICAM1	CASP7	DRD1	SI
GABRB1	ITGB2	OPRM1	GABRA6	MGAM
ECE1	ITGA1	CPB2	PRLHR	SLC2A1
ADAM12	MAOB	AVPR1A	HSD11B2	ADORA2A
RAD51	ALOX15B	PSENEN	ATP5F1B	PDCD4
RNASEH1	RPS6KA5	SIRT1	KDM3A	LGALS3
GPR84	KLK1	PEPD	PROX1	KAT2B
SPR	KLK2	HDAC7	BAD	PRKCA
MMP26	HSP90AA1	APH1A	PTPRF	PLA2G1B
CTSL	MT-ND4	APH1B	CCL4	ADRA2B
MMP14	CHRNA7	NCSTN	SDC1	MAPK1
HTR1E	CHEK1	PSEN2	TYK2	ADORA3
MMP17	WEE1	ITGA2	GALP	MAPK14
MMP15	QDPR	MMP7	NCOA1	RBP4
MMP1	ALPG	PSEN1	CDKN1B	CNR1
STS	PLAA	GRB2	ADARB1	CNR2
NLRP1	DNM1	SIRT3	CTSC	NEK2
PIR	TYMS	DPP7	EHD1	AURKB
CA9	RPS6KA3	KDM4D	CPS1	PIK3R1
SLCO1B1	ROCK1	CTSD	CYP19A1	PIM1
RAPGEF4	PRKACA	LGMN	DEFB1	IGF1R
SLC22A3	CLK1	HDAC2	ALB	BRAF
AKR1C2	DYRK1B	CCKAR	FGG	GAPDH
C3AR1	INSR	HDAC6	G6PD	TLR4
FURIN	ESRRB	HDAC11	GIPR	HPSE
GART	PDPK1	SIRT2	GJA5	ADORA1
NPFFR1	HTR2A	MTNR1A	PCSK1N	STAT1
NPFFR2	DRD2	PSMB10	GPR12	BAD
PLA2G2A	CYSLTR1	MTNR1B	GSTT1	TRPM8
SLC46A1	ADRA2C	CACNA1H	HMGCS1	AKT2
PIN1	ADRA2B	KDM1A	HTR1B	HSD11B2
QRFPR	TACR2	EPHX2	APOBEC1	CHRM2
MAGI3	CHRM3	BMP1	RHOA	REN
FPR1	UPP1	PSMB1	MAPT	ACACB
CAPN1	PNMT	ATIC	KITLG	PPIA
GLS	RAF1	XIAP	MYC	ELANE
KLK8	BRAF	UTS2R	MYOD1	GPR55
FCER2	DCTPP1	PGGT1B	MYOG	MAP3K7
SLC19A1	CYP24A1	KIF11	NCF2	INSR
KLK4	GCGR	MAPK8	NDUFB6	PIK3CG
DLG4	F3	FDFT1	ATP4B	TNNI3
FOLR2	ESRRG	CPB1	OTC	PTPN22
MBOAT4	ADAM17	TACR1	OXCT1
GGH	MAPK3	F13A1	ATP5F1D
FOLR1	RIPK2	SSTR1	PDE3A
PCSK1	PIK3CB	HDAC3	PIK3R1
PCSK5	CYP3A4	CPN1	PRKCD
GNPAT	PIK3CA	CYP2C19	PRKCI
LTA4H	HSP90AB1	CASP6	PLSCR3
LAP3	DAO	BCHE	GPAM
CAPN2	PIK3CG	PLAT	RSC1A1
KLK2	PTPN11	PLA2G10	BDNF
TMPRSS15	ACVRL1	SSTR4	ABCG5
SHC1	GRM2	CYP51A1	SFTPB
SLC2A4	HDAC2	CCR8	SFTPA1
PRSS1	MPEG1	OPRK1	SLC9A3
MC3R	XIAP	TAS2R31	SLC10A1
MC1R	RELA	ESRRA	AACS
ITGB1	NEK1	ALOX15B	BNIP3
IL2RA	PPARG	CYP19A1	SRD5A1
TRHDE	FUCA1	DRD5	STAT4
SLC1A1	EGLN3	TUBB1	C5AR1
ITGA4	HCAR2	TPMT	EHMT1
SERPINC1	MAP2K1	CTSA	CAV2
ACER2	FBP1	PTGDR2	FADD
RCOR3	CTNNB1	AKR1C3	FAIM2
EPOR	MTNR1A	ACHE	DMD
PTPRC	ERBB2	LYPLA2	BEST1
DHFR	MAPK8	QPCTL	CTNNB1
SLC1A5	HTR1A	LYPLA1	LMNA
DNPEP	SRD5A2	NFE2L2	SEC16B
ITGA2B	LYPLA1	TRPV1	COMT
PADI1	LYPLA2	PTGER1	ETV5
MMP11	ACLY	FKBP1A	APPL1
PSMB5	TUBB1	ERN1	PTEN
CTSB	AMPD3	FABP4	HNF1A
HLA-A	CALM1	KMO	TFAP2B
IDE	GRB2	EP300	EGF
ITGB3	SLC6A3	DRD1	ARG1
CCKBR	POLA1	RXRA	PRDM16
KYNU	MCL1	TOP2A	NRXN3
CBX7	BCL2	ADRB2	ATP6AP2
GPR139	GUSB	SLC5A1	DUSP6
MC4R	CYP27A1	SLC5A2	CADM2
STAT3	CCNE1	SLC5A4	HNF4A
NPR3	NTRK1	PDK1	MLXIPL
GSTK1	MAPKAPK2	GRIK3	MAGEL2
TMPRSS6	CSNK1G1	BBOX1	MAP2K5
LY96	RPS6KA1	SSTR3	RAP1A
CTSK	MTOR	SSTR2	KISS1R
SLC1A2	PIM2	HTR1D	H6PD
KLK1	PIM3	HTR1B	ABCA4
HAGH	BMP1	TACR2	SETD2
SLC15A2	GLI2	EDNRA	HLA-DRB1
TGM2	GLI1	SSTR5	SOX6
NOD1	CCNA1	HTR1A	MTMR9
GSAP	CCNA2	DRD4	TBX1
CASP3	CES1	HTR2A	UBE3A
PCSK2	HSD17B14	HTR5A	HDAC4
TYMS	CYP2C9	HTR2C	CEL
NPY4R	CYP2C19	DRD2	LINGO2
FNTB	KIT	SLC6A4	EMD
CASP10	FGFR1	DRD3	PDX1
FNTA	CYP11B1	HTR2B	ANOS1
P2RY12	CYP11B2	HTR6	MECP2
PADI3	CYP17A1	EDNRB	NF2
RNPEP	CDK4	PRKAB1	PAX6
CTRB1	ABL1	ADCY5	WWOX
HPN	TRPM8	AKT1	WNT4
KLK3	KDM1A	HTR4	LZTFL1
PADI4	DRD1	ALB	AHI1
F2	SNCA	HDAC9	PROK2
F10	ALPL	HDAC5	ABCC8
PADI6	LNPEP	POLB	TULP1
GSTM1	ILK	IMPDH1	KMT2D
PCSK6	IGFBP3	FABP5	CUL4B
PYGL	PLAT	PTPN6	CEP19
PTPN2	F10	KCNA5	EIF2S3
CASP9	GAA	NR0B2	ELN
TACR3	PLA2G5	PTPsigma	ARL13B
OPRD1	HDAC6	MAOB	FGFR3
CBX4	HTR2B	PTPN11	TRIM32
HDAC8	HTR2C	RELA	FTSJ1
HGFAC	HTR7	BACE1	GATA4
HPGDS	TDO2	RARA	GLDC
PCSK7	ADRA2A	EGFR	KCNJ11
PTPRA	HTR1B	F3	NEUROD1
FPGS	HTR1D	ALPL	PAK3
ITGAV	ADRB1	RARG	TNNI3K
PPARG	HTR1E	GRM3	RAB23
ST14	SLC6A4	CA13	KIDINS220
XPNPEP1	HTR6	SLC16A3	RPTOR
KCNQ2	CAPN2	KDM6B	RFC2
SIGMAR1	TACR1	FEN1	BLK
PSMB2	KIF11	HAO1	SOX2
SLC1A3	CPN1	EPHX1	SOX3
ICMT	DDO	IL6ST	WT1
PTPN1	TLR4	FTO	HESX1
CTSH	MAPK1	FUCA1	ARNT2
CACNA1I	NGFR	MMP16	MED12
PPARA	CTBP2	AOC3	NR2E3
CASP8	NFE2L2	EGLN3	ZGLP1
TMPRSS11D	STAT3	LDHB	GHRLOS
CTSS	GABRB3	EGLN1	KCNJ18
CTRC	AHCY	FDPS	BCDIN3D-AS1
GSTP1	NUDT1	TBXA2R	FPGT-TNNI3K
GPR183	SLC16A1	KDM4C	HUWE1
PLG	NMUR2	KDM4A	LINC01524
GHSR	IL2	HDAC4	SCN1A-AS1
HMGCR	SLC29A1	NR1H2	TOPORS
CTSG	COQ8B	PTGS1	APC2
NPR1	YES1	CHRM1	SEMA3A
CTSE	TXK	CYP2D6	MERTK
ADA	TYRO3	HCAR3	DEAF1
KLKB1	LYN	PTGS2	LRRC53
KEAP1	FGR	ADRA2C	PRPF8
P2RX4	CSK	ACP1	FARS2
PLAU	BTK	TOP1	CETP
CASP7	PTK6	IL6	LINC02465
OPRM1	BMX	FUT4	LINC02055
F7	BLK	PGD	PNPLA6
CPB2	VCP	ST3GAL3	IFT27
AVPR1A	TAS2R31	HIF1A	MID2
TAS1R1	SLC5A2	GRIK1	CRYZL2P-SEC16B
PSENEN	RXRA	GFPT1	IL1RAPL1
RRM1	PDK1	GRIK2	PNKP
NTSR1	SERPINE1	GRM6	NLRP3
SIRT1	PLA2G2A	GRM8	ADCY9
PEPD	ODC1	GRIK5	RAB39B
HDAC7	HDAC7	NOS2	APOA5
APH1A	PLA2G10	GRIA4	CLCN4
APH1B	EPHB3	ARG1	CANT1
NCSTN	EPHB2	GRIA2	CNGB1
PSEN2	EPHB1	NOS3	CNGA1
RPS27	EPHA8	NOS1	PROKR2
NPY1R	EPHA7	SLC6A12	ZNF513
ITGA2	EPHA6	GABRR1	POC5
XPNPEP2	EPHA5	KDM5C	HGSNAT
MMP7	EPHA4	KDM3A	PTCHD1
PADI2	EPHA3	KDM5B	CRX
PSEN1	EPHA1	KDM5A	SOCS2-AS1
GRB2	EPHB4	KDM2B	RDH12
CASP4	CTSL	PARP15	CTSH
SIRT3	CTSK	HSD17B14	KLB
CARM1	CBR1	DDO	C8orf37
DPP7	BCHE	NEU3	CYP7A1
PRSS3	ADORA3	CHRNB4	DGKG
CDYL2	ADORA2B	CHRNA3	DCC
SIRT5	CDK3	CLK1	LRRN4
KDM4D	ABAT	DYRK1B	ARX
CTSD	GRM8	PFKFB3	DLG3
LGMN	GRM1	DHODH	AGER
HDAC2	GRM7	KCNN4	DNMT3A
CCKAR	GRIK2	CREBBP	DPP4
HDAC6	OAT	CYSLTR1	AGT
CACNA1G	GRIA1	DYRK1A	AGTR2
NMUR1	GRM3	MCL1	EDN1
CDC42	GRM6	RXRB	MEGF8
HDAC11	SLC1A2	RXRG	AHSG
SIRT2	GRIA4	HNF4A	ERBB2
NPPA	KMO	CAMKK2	FABP4
PSMA1	GRIK5	ACLY	FABP2
PSMA2	GRIK3	CNOT7	ACSL4
PSMA3	GRIA2	NAAA	FAT1
PSMA4	BBOX1	PREP	JMJD1C
PSMA5	REN	BCL2A1	FGF8
PSMA6	ANPEP	SCN5A	FHL1
PSMA7	FUT7	HRH2	CNKSR2
PSMB11	LDHA	CYP2C9	ZNF365
PSMB3	LDHB	NPY5R	SNRNP200
PSMB4	HDAC8	LDHA	FOXO1
PSMB6	BCL2L1	WEE1	IQSEC2
PSMB7	SQLE	LCK	POGZ
PSMA8	ALB	FAP	FLII
NOD2	ERN1	CASR	SYNE2
NCOR2	FDFT1	GRM4	DDHD2
MTNR1A	PYGB	PDE5A	RPGRIP1L
ITGB5	FNTA FNTB	CTSV	TTC28
PSMB10	ITGA2B	CD81	SYNE1
MTNR1B	LAP3	COMT	ARHGEF18
NPEPPS	SLC18A3	CDK5	ADNP
GPR88	NOS1	PIP5K1C	CRB1
CACNA1H	NOS2	ABL1	ARL2BP
ABCC8	NOS3	CCNT1	PDSS1
HDAC10	PRKCA	NLRP3	FLRT3
KLK6	NR3C1	CCNA2	PRPF6
KDM1A	NAAA	SLC9A1	FNDC5
EPHX2	PTGER4	CDK6	GABPA
BMP1	RARG	CSNK2A1	GABRA3
TPSAB1	RARB	CYP3A4	GABRD
PSMB1	RARA	SYK	FSCN2
CAPNS1	GNPAT	GLI2	SIN3A
NR0B1	SLC10A2	TDP1	NSMF
ATIC	UGCG	AKR1A1	COPD
DDOST	GBA	PRKD1	PRPF31
XIAP	GBA2	IDO1	IFT172
ADAMTS4	AKT2	NOX1	MYCBP
UTS2R	ROCK2	CHEK1	TBL2
PGGT1B	ALDH2	CCR2	GDI1
STAT6	FOLH1	TDO2	HS6ST3
PSMB9	PAM	ITGB7	RNU1-1
SPPL2A	FFAR4	PTPRF	GHR
KIF11	SLC7A5	CYP2A6	GHSR
MAPK8	CPB2	PRKCB	RBMX
ITGA5	GPR55	PRKCH	AMY1A
FDFT1	GPR18	SGK1	AMY1B
PARP3	MKNK2	PRKCE	AMY1C
CPB1	GPER1	MAPK9	GNAT2
TACR1	ADCY10	GABRA6	GP1BB
BRCA1	PLK4	IMPDH2	TTC28-AS1
KISS1R	SHH	SLC6A3	CCDC141
F13A1	JAK1	SLC6A2	GPT
SSTR1	TYMP	CDK1	GRN
ITGB8	PGR	SMARCA2	GTF2I
KLK5	IL6	CHRNA7	GUCA1B
HDAC3	GLUL	PLA2G7	SH3KBP1
CPN1	JAK2	NGFR	HCFC1
GRIA3	LRRK2	GABRA2	HIF1A
SLC12A2	SLC5A4	GABRA3	HLA-DQB1
CASP5	HDAC1	GABRB3	HOXB3
FPR2	MAP2K2	GUSB	APOA1
P2RX1	MAPKAPK5	GABRA5	IAPP
SENP1	MMP8	HRH4	APOB
ERCC5	SLC22A2	PYGM	FFAR4
LHCGR	ADRB3	PRKCG	IDH3A
CYP2C19	MAP3K7	STK3	IDH3B
PSMB8	MAP3K14	ADRB1	EYS
CASP6	MGAM	CYP11B2	ZNF81
BCHE	PON1	F12	IGF1
PLAT	PLAU	CYP11B1	APP
PLA2G10	KYNU	NAMPT	APRT
EGLN2	DRD5	CHRNB2	KLK3
F11	MTNR1B	CHRNA4	IL1A
SSTR4	DRD3	PTAFR	IL1RN
CYP51A1	CHEK2	ABCC9	IL6R
CCR8	PRKCE	CCR9	CXCL8
CFB	PRKCG	SLC18A3	IL17A
OPRK1	PRKCD	GRM1	IMPDH1
TAS2R31	PRKCB	HCK	INSR
ESRRA	PRKCH	CDK9	ACADVL
ALOX15B	TNNC1	HSP90AA1	ITPR3
CYP19A1	TNNT2	HTT	KIF7
DRD5	TNNI3	CYP24A1	CERKL
TUBB1	HSP90B1	HSP90B1	LHFPL3
TPMT	MPG	PTGES	KCNH2
DHCR7	MELK	SI	PCARE
LPAR5	EP300	MGAM	FEZF1
CTSA	MAPT	SLC2A1	USP27X
KCNB1	TOP2A	ADORA2A	LIMK1
NFKB1	MYLK	PYGB	EML6
EBPL	PDE10A	LGALS4	LINC01122
PTGDR2	GPR84	LGALS8	CASC15
AKR1C3	CALCA	PDCD4	ARL3
HCN4	CNOT7	ADK	HOXB-AS3
TSPO	PTAFR	LGALS3	SMAD4
ACHE	OPRK1	KAT2B	MAK
LYPLA2	JUN	PHLPP2	ARVCF
QPCTL	GLRA1	RASGRP1	MFAP1
LYPLA1	GLRA2	MPEG1	NR3C2
CD69	PTPA	PRKCA	MOG
KLF5	IKBKB	PTGIR	MTHFR
TRPM5	NTRK2	GBA	MYH9
NFE2L2	NAE1	PLA2G1B	NCAM2
TRPV1	CYP1A1	ADRA2B	RERE
NCEH1	PRKDC	MAPK1	NEK2
PTGER1	ST6GAL1	ADORA3	NFE2L2
FKBP1A	OPRD1	MAPK14	NINJ1
ERN1	SIGMAR1	RBP4	NPHP1
GFER	CCND1	CNR1	NRL
TNFRSF1A	PDGFRB	CNR2	BDNF-AS
FABP4	FLT4	HPGD	SCAPER
EBP	TEK	CAMK2B	OTX2
KMO	SRD5A1	CXCR1	P2RY11
EP300	KCNA3	AXL	PAX4
DRD1	MAPK14	NEK2	PAX5
RXRA	F13A1	AVPR2	IMPG2
IARS1	BRD9	AURKB	PCDH9
CHRM5	KCNJ6	PIK3R1	WDPCP
IKBKG	OPRL1	ALK	INSIG2
PTPN7	OPRM1	PIM1	NIN
TOP2A	CTRC	PTK2	PDE4D
NQO1	HTT	IGF1R	PDE6A
MDH1	KCNJ5	BRAF	PDE6G
ADRB2	GABRA5	KDR	PDGFB
PDK4	KCNJ3	MYLK	PDE6B
SLC5A1	HTR4	SHH	SUFU
TCF4	HTR5A	PNP	PIK3CA
PDK3	PDGFRA	MT-ND4	PIK3CB
SLC5A2	FDPS	GAPDH	PIK3CD
SLC5A4	HCAR3	SLC47A1	PIK3CG
PDK1	PLEC	PIM3	PLG
GRIK3	CDK9	KYAT3	POLG
BBOX1	CYP2A6	MAG	PON1
SSTR3	HTR3A	LGALS7	PRMT7
SSTR2	CCR1	CHIA	POU3F4
HTR1D	CCR5	TLR4	UGT1A10
RUVBL1	CCR8	HPSE	UGT1A8
HTR1B	BCL2A1	SLC47A2	UGT1A7
TACR2	TRPV1	ADORA1	UGT1A6
EDNRA	TGM2	STAT1	UGT1A5
MC5R	FGFR3	MAP2K1	ATRX
SSTR5	CHRNA4	DUSP3	UGT1A9
GRPR	CHRNB2	BAD	UGT1A4
HTR1A	HRH3	TRPM8	UGT1A1
KAT8	HRH4	AMPD2	UGT1A3
PAK4	GFPT1	AKT2	IL17RD
LTB4R2	HRH2	GDA	CNNM2
DRD4	HRH1	HSD11B2	PHIP
HTR2A	ENPEP	CHRM2	PRKAA1
NCOR1	SIRT3	REN	POMGNT1
HTR5A	SIRT2	CHRM3	PRKAA2
HTR2C	ADK	ACACB	CHD7
DRD2	CHRM2	METAP1	PRKAB1
PPIB	TGFBR1	PPIA	WDR11
SLC6A4	TAAR1	GRM2	ERMARD
DRD3	PHLPP2	ELANE	SPATA7
HTR2B	KCNMA1	GPR55	KIZ
CAMK2D	TUBB3	ACVRL1	ANGPTL8
MMP25	FLT1	PDGFRA	MAPK1
HTR6	PIK3CD	MAP3K7	KLHL7
EDNRB	HCK	INSR	MAPK8
PRKAB1	PI4KB	PIK3CG	PRL
ADCY5	GAPDH	TNNC1	RETN
AKT1	PLA2G7	TNNI3	MRPS22
HTR4	FAP	TNNT2	PNPLA2
ALB	RET	PTPN22	PTH
HDAC9	PREP	TLR9	HACE1
PRKAG1	ASF1A	KCNA3	KIAA1549
HDAC5	SLC9A1		SLC7A14
POLB	CCND3		SUGP1
IMPDH1	SERPINH1		HAMP
FABP5	CSNK1A1		PTX3
PTPN6	CSNK1D		RAP1B
KCNA5	TTK		RBP3
NR0B2	SIRT1		PRPH2
PTPsigma	F12		REN
HSPE1	MAPK10		RGR
HSPD1	MAPK9		RHO
MAOB	CCND2		RLBP1
NSD2	OXTR		AGBL5
PTPN11	AVPR1A		ROM1
STK17B	CTSB		RP9
DAPK2	CCNE2		RP1
RELA	GNRHR		RP2
BACE1	AVPR1B		RPGR
RARA	AGTR2		RPE65
GNB1	PPIA		RPS6KA3
GNG2	MMP14		RREB1
EGFR	MMP7		SAG
F3	MMP10		BGLAP
ALPL	HDAC11		SCN1A
PSMD14	HDAC4		CXorf56
RARG	CCKAR		SEMA4A
HMGB1	CRHR1		NSD1
GRM3	IGFBP6		SHBG
ME1	IGFBP4		SHOX
DAGLA	IGFBP5		SKI
CA13	IGFBP2		UPF3B
SLC16A3	IGFBP1		RSRC2
LPL	BAD		SLC2A4
KDM6B	VEGFA		SLC5A2
ACP3	FGF1		SLC6A4
FEN1	FGF2		SLC8A1
HAO1	HPSE		SMARCB1
ADH1C	LGALS4		SOX10
EPHX1	LGALS3		SPP1
IL6ST	LGALS8		BRAF
ADH1B	FAAH		SRY
FTO	SCD		BRCA2
ASAH1	PTPN2		BRS3
FUCA1	CYP51A1		SYP
MMP16	PTPN6		TACR3
MLYCD	PTPRF		TAF1
AOC3	ACP1		TBCE
RGS8	RORC		TBX3
LARS1	CD81		TCF7L2
EGLN3	GCG		TCOF1
SLC18A2	EPHX1		TSPAN7
LDHB	ENPP2		TP53
PLAUR	DGAT1		HIRA
AGER	FASN		TNFSF4
EGLN1	GCK		UFD1
FDPS	NR0B2		USH2A
TBXA2R	CYP26B1		CLRN1
KDM4C	METAP1		KDM6A
S1PR4	ACACB		VDR
KDM4A	S1PR1		VEGFA
HDAC4	F2R		CLIP2
TMEM97	RXRG		ZNF711
NR1H2	RXRB		ZNF41
PTGS1	RORB		CA4
CHRM1	RORA		PRCD
CYP2D6	ADRA1D		CACNA1S
HCAR3	CYP2D6		CCDC28B
PTGS2	ADRA1A		TMEM43
APOBEC3A	PPM1A		IRX3
ADRA2C	PTGES2		STEAP4
CD22	CCR9		ZNF408
B4GALT1	HNF4A		ALG13
ACP1	CCR2		RABEP2
ALDH1B1	TP53		DHDDS
ALDH1A2	ABCB11		GLRA3
HRAS	HPGD		IFT74
TOP1	CSF1R		CEP290
IL6	BRS3		SPG11
LGALS9	CTSV		ALPK1
FUT4	CASP3		IFT88
PGD	CASP6		SPRY4
ST3GAL3	CASP7		LAS1L
PGAM1	CASP8		USP9X
SLC7A11	GHSR		TRAPPC9
HIF1A	CASP2		FAM161A
PTPN12	NR1H2		CCDC77
GCLC	SMO		KLF11
BHMT2	PRCP		SLC9A7
GRIK1	MST1R		OFD1
GFPT1	ZAP70		KCNAB2
GRIK2	FGFR4		SHANK3
GRM6	TIE1		IRS2
GRM8	MERTK		DGAT1
BHMT	ROS1		FGF17
GRIK5	NTRK3		PROM1
NOS2	IL6ST		CCK
ARG2	GRIN2A		BAZ1B
OTC	NR1I2		AIP
GRIA4	SLC6A9		USP8
ARG1	CACNA1H		TMEM67
GRIA2	MDM4		PRPF4
NOS3	GRIN1		PRPF3
DDAH1	DBH		CDHR1
NOS1	PRKD1		LRAT
CASP14	DAPK3		BBIP1
GPR174	GSK3A		REEP6
DPP8	PRKAB1		NRXN1
SPSB2	DNMT3B		HS6ST1
DPP9	NEU3		ARHGEF6
P2RY10	MPI		GDF15
CTH	SLC19A1		GTF2IRD1
SLC6A12	FOLR1		CLOCK
ADSS2	FOLR2		SEC24C
GABRR1	SLC46A1		IFT140
KDM5C	FPGS		FRMPD4
KDM3A	GART		DHX38
CAD	ATIC		TRIM66
MBTD1	MMP16		FGF19
P4HA1	HDAC5		ZBTB7C
HIF1AN	HDAC9		GCKR
KCNK9	SFRP1		MSTN
KDM5B	IMPDH1		LPA
KDM5A	EIF2AK2		ARSA
CYCS	EZR		MPO
KDM2B	ADRA1B		NNMT
ACMSD	NR3C2		BAAT
PARP15	AOC3		SORT1
CHRNG	CHRNA3		CIDEC
CHRNB1	KAT2B		SPARC
DUSP22	AADAT		SPX
HSD17B14	KYAT3		IL33
CHRNA1	DPP7		CMKLR1
DDO	CHRNB4		GPBAR1
NEU3	PGF		GRK2
UQCRB	DNMT1		EDNRA
PLA2G2D	KCNH2		LPIN1
PFKFB4	PGD		GAD2
KDM4B	ST3GAL3		GCGR
PRKAA2	FUT4		APOA2
KCNK3	STAT1		APOC3
MITF	TPO		MIR122
CHRNB4	MALT1		MIR155
S100B	ATP12A		MAOA
CHRNA3	GIPR		PHB
CLK1	CTSS		CHDH
DYRK1B	ADCY5		AZGP1
GLRA3	SI		ACKR3
PFKFB3	LGALS7		SFRP5
EIF4H	MAG		SI
RCE1	SSTR5		CASR
DHODH	SSTR2		MGAM
KCNJ11	SSTR4		CD59
PHGDH	SSTR1		CXCR6
LDLR	SSTR3		GPR151
L3MBTL3	SELL		CPT2
HKDC1	SELE		NRG4
KCNN4	SELP		ADRA1A
CREBBP	CHIA		ADRA2B
TDP2	SGK1		AGTR1
CYSLTR1	TDP1		EPO
SLC6A7	CISD1		FBN1
DYRK1A	PNP		SIRT2
SENP7	TRPV3		PCSK9
MCL1	PER2		AMH
RXRB	JAK3		GPR42
RXRG	KCNE1		IL15
PARP16	ABCC9		ENHO
HNF4A	KCNA5		LGALS3
LIG1	SCN5A		MIR146A
NR4A2	SCN9A		MME
RPA1	NPY5R		MMP2
CAMKK2	STK3		CDKAL1
SLC13A2	LIPA		LGR6
SLC13A3	STK26		MBOAT4
ACLY	ITK		TNMD
MVD	CASR		SSTR4
KDM7A	C5AR1		THBS1
CNOT7	ICMT		TNFRSF1A
SCN2A	PRKCQ		CAT
FAAH2	CLK4		LPAR2
SLCO2A1	RASGRP1		KHDRBS1
NAAA	BRD4		ADAMTS13
PREP	UTS2R		CAPN10
BCL2A1	PABPC1		NISCH
ALDH1A1	DUT		MGLL
SCN5A	KCNQ1		C1QTNF5
HRH2	SLC47A1		MRGPRX3
PLCG2	SLC47A2		MRGPRX4
ALDH3A1	FKBP1A		MAPK14
ADAMTS5	PGC		CXADR
PRNP	PGA5		OXER1
GGPS1	PGGT1B		DIO2
CYSLTR2	PSMB10		EGFR
CYP2C9	PDCD4		F5
NPY5R	SCARB1		GPRC6A
METAP2	FKBP5		ANGPTL2
PNPO	FKBP1B		LPAR3
LDHA	PDE2A		MRGPRX1
GLRB	EIF4E		IL37
WEE1	FGFR2		ANPEP
LCK	FKBP4		GOLGA6A
TPH1	P2RY12		ITGAX
TPH2	KLK3		LECT2
FAP	SF3B3		MIR221
CASR	S1PR2		MIR27A
GPR142	ATP6AP1		VN1R17P
GRM4	CCNT1		GPR166P
PDE5A	IKBKE		NTS
CTSV	TBK1		TNFRSF11B
LRP6	TRPV4		GAL
XPO1	BDKRB1		PDK4
CD81	NAMPT		AVP
COMT	CCR4		RCBTB1
VRK2	MMP15		CHPT1
MNAT1	EZH2		TRIB3
MAK	SLC2A1		CCND1
ACVR2A	ADRB2		BRD2
CDKL5	MGLL		ATXN2
CAMK4	ATP1A1		SGK1
CDK13	QPCTL		SLC2A1
CSNK1A1L	QPCT		WNT5A
CDC42BPB	CLK3		CNBP
STK32A	DYRK2		CAD
CDK5	MKNK1		FGF23
PIP5K1C	CDC25C		FZD4
ABL1	F9		MBD2
CCNT1	MBD2		GRAP2
CDK15	SMARCA2		TRIM13
ACVR2B	PITRM1		AHSA1
CDK18	NOX1		PLIN2
NLRP3	SLC15A1		ADM
CILK1	PEPD		GPR119
CCNA2	GDA		CRK
CDK14	PCSK7		F2RL1
DSTYK	COL4A3BP		F3
SLC9A1	ITGB7		FKBP5
CDK6	LGMN		NUP62
CSNK2A1	ACPP		RNF19A
CYP3A4	P2RX3		POLDIP2
SYK	PSMB2		SLC17A5
ALDH1A3	PSMB1		ANGPT1
POLI	PSMB5		GTF2H1
GLI2	SLC5A1		HGF
TDP1	FARS2		NR4A1
AKR1A1	NR4A1		HSPA1A
SMAD3	PIK3C2B		HSPA1B
PRKD1	TNK2		KRT16
SLC8B1	EIF2AK3		LCT
LOXL4	NLRP3		ARNTL
IDO1	FCER2		MIR143
LOXL3	GABRA6		ARR3
NOX1	NEU2		MIR33A
LOX	NEU4		MGAT1
UBA1	TTL		MIF
MAP2K7	IRAK4		MSRA
CHEK1	RCOR1		MTNR1B
HTR1F	CDK7		MTRR
CCR2	MAPK15		MYD88
DPYD	CAMKK2		OPRM1
TAB1	INSRR		OSM
TDO2	SORD		OXTR
ITGB7	ADCY1		DCTN4
PTPRF	CCNH		BFAR
CYP2A6	PRSS1		ACP1
PRKAA1	OXSR1		PGR
UCHL1	PIK3C2G		CCHCR1
PRKCB	TRPM6		ITLN1
PRKCH	PIP4K2C		APOM
SGK1	PIP5K1C		MAPK3
PRKCE	MAP2K3		NMUR2
MPL	CSNK1G2		MOK
EIF4A3	PRKD3		ACE2
PTPRG	MAP2K4		BCL2A1
MAPK9	ERBB4		RENBP
GABRA6	AAK1		RORC
IMPDH2	STK16		ROS1
RXFP2	CSNK2A2		SAA1
SLC6A3	CLK2		CEACAM1
SLC6A2	GAK		BMP4
CACNG8	FEN1		SLC5A1
H1-0			CXADRP1
PKM			SPG7
CDK1			TLR2
BCL6			TLR3
MDH2			TM7SF2
PASK			VCAM1
SMARCA2			WNT1
CHRNA7			WNT10B
PLA2G7			XBP1
NGFR			AIMP2
QTRT1			MFRP
PARP12			SERPINA6
GABRA2			CCN4
GABRA3			SQSTM1
TRPM2			SELENBP1
GABRB3			XPR1
GUSB			IL32
PARP4			CD14
GABRA5			GPR55
PARP14			CDH13
AURKC			FST
HRH4			IGF2BP2
MARS1			METAP2
PYGM			LOC110806262
PPM1B			CHI3L1
AOC1			CNTF
PRSS8			LYPLAL1
CPM			MAP3K8
GSTA2			COX8A
AKT3			CTLA4
PRKCG			ADRA2A
PRKD2			DBP
CDC42BPA			DECR1
SGK2			SLC30A8
DYRK3			APLNR
PRKG2			EPHB2
STK3			ESRRA
TAOK3			FGF1
PRKX			FOXC2
ADRB1			FN1
CYP11B2			ANKK1
CHRNA5			GC
F12			GHRH
CYP11B1			SPINK4
KLK14			HPGDS
NAMPT			ANGPTL3
CYP2B6			RABGEF1
CHRNB2			FFAR1
CHRNA4			GPS2
PTAFR			TBK1
ABCC9			CXCL2
CCR9			A1CF
SLC18A3			ACACA
SGMS2			HMGB1
KLK7			HSPA4
VHL			HSPD1
PIK3C2A			IFNA1
STK11			IFNA13
GRM1			IGFBP1
CRACR2A			IL2
STAMBP			INPPL1
HCK			KCNQ1
CDK9			KNG1
CDK8			ARG2
EEF1A1			KRAS
EEF1A2			C1QTNF12
HSP90AA1			MCL1
TLR2			MEST
HTT			MGAT2
CHRNA10			COX2
CHRNA9			MTTP
CHAT			NFKB1
CYP24A1			NHS
SENP8			NM
SLC37A4			NPPC
SENP6			NOX4
PAK1			IL22
KIF20B			SCLY
TLR1			PKD1
HSP90B1			TERF2IP
PTGES			MAPK9
FPRPYGB			PSMD9
SI			MIR146B
MGAM			CXCL5
P2RY14			SFTPD
SLC2A1			CRTC3
ADORA2A			SNRPN
CDA			TFAM
PYGB			TMPRSS2
LGALS4			TPD52
LGALS8			TWIST1
GJB2			VGF
GANC			TRPM8
OGA			CALCR
HEXB			SESN2
HEXA			SYVN1
AMY2A			DGAT2
GLA			DLK1
HK2			CREG1
UMPS			PTER
HK1			ABCG2
GLB1			CD38
AGL			CD44
PDCD4			FOXO6
ADK			LINC01672
HSPA5			PTPRU
LGALS3			LRPPRC
KCNA2			CDK4
BAZ2A			GDF11
KCNA1			LOC102723407
KAT2A			PERCC1
KAT2B			SORBS1
PHLPP2			POSTN
RASGRP1			EBP
GNAI1			MTCO2P12
GNAI3			CHGA
CYP4F2			FSTL1
CERT1			SLC6A14
MPEG1			C1QTNF6
GNAO1			CISH
ADH7			LEAP2
GPR34			ACVR1C
PLA2G2C			CREBBP
POLM			CX3CR1
PAOX			CYBA
SMPD2			CYBB
SPTLC2			DDT
ADH1A			DNMT1
PRKCA			NR0B1
SPHK1			EIF4EBP1
PTGIR			ESRRG
POLL			ALDH1A1
ATG4B			MMRN1
GBA			AKR1B1
CPT2			ZFPM2
PLA2G1B			FOS
ADRA2B			BACE1
MAPK1			ALOX5
ADORA3			FSHR
MAPK14			NR5A1
LANCL2			CERS6
RBP4			NOCT
SPTLC1			HSPA12A
PAFAH1B2			SPAG8
CNR1			GAS6
CNR2			GGT1
MPC2			PDCD4
HPGD			ANGPT2
CAMK2B			FFAR2
CXCR1			REM1
AXL			KLF15
NEK2			PYCARD
AVPR2			GSTM1
AURKB			GUCA2B
PIK3R1			RMC1
ALK			PSAT1
PIM1			CFH
PTK2			HOXA5
IGF1R			HTR2B
BRAF			APOA4
KDR			HCAR2
MYLK			APOC1
C9			LCE1C
ADH5			FAS
SHH			IL1R1
MTR			IL4
MTHFD2			IL6ST
HPRT1			CXCL10
PNP			INSIG1
MT-ND4			INSRR
NDUFAB1			IRF5
NDUFAF1			IRF6
NDUFA1			KCNK3
NDUFA2			GFRAL
NDUFA3			C1QL3
NDUFA5			LIPA
NDUFA6			LOX
NDUFA7			LRP5
NDUFA8			MIR126
NDUFA9			MIR148A
NDUFA10			MIR199A1
NDUFA11			MIR199A2
NDUFA12			MIR223
NDUFA13			MIR26B
NDUFB1			SMAD3
NDUFB2			MBL2
NDUFB3			MMP1
NDUFB4			MMP3
NDUFB5			ATF4
NDUFB6			NDN
NDUFB7			NDUFAB1
NDUFB8			CCN3
NDUFB9			OLR1
NDUFB10			PRKN
NDUFB11			TAS2R13
NDUFC1			PC
NDUFC2			SOST
NDUFAF2			PDE3B
NDUFAF3			GPRC5B
NDUFAF4			ARID4B
NDUFS1			ABCB1
NDUFS2			PLA2G1B
NDUFS3			LEPROT
NDUFS4			MEG3
NDUFS5			PPY
NDUFS6			APOBR
NDUFS7			CTNNBL1
NDUFS8			LRRC8A
NDUFV1			TAS2R38
NDUFV2			MIR181D
NDUFV3			ARRDC3
MT-ND1			UBL5
MT-ND2			SLC25A19
MT-ND3			RNASEL
MT-ND4L			S100A9
MT-ND5			SCN10A
MT-ND6			NOD2
NDUFA4L2			SELENOP
NDUFA4			SFRP4
GAPDH			HIF3A
SLC47A1			SLC6A3
PIM3			SLC6A8
CACNA1S			GGTLC5P
KYAT3			BRCA1
PRTN3			SST
FADS1			STAT5A
ABCC2			STAT5B
SLC8A1			SULT2A1
MAG			ADAM17
AMDHD2			BTF3P11
LGALS7			SNORD116@
CHIA			TH
TLR4			THY1
HPSE			TLE3
LGALS1			TLR5
LGALS7B			TSHR
SCN4A			CAPN5
VIPR2			TST
SLC47A2			TTN
ACKR3			GGTLC3
LOXL2			GGT2
PDE6A			CCR2
ASIC3			GGTLC4P
ADORA1			VPS51
PI4KA			VWF
STAT1			TFEB
BMP4			CALCA
MAP2K1			HDAC11
FSHR			NR4A3
CXCR3			MOGAT2
HCRTR1			CALR
HCRTR2			NRIP1
DUSP3			ARID1A
CAMK2A			MCHR2
TXNRD1			FAM71F1
AKT1S1			OGT
CTSC			APOL1
BCL2L2			TSLP
BAD			LGR5
RPS6KA4			HDAC3
TRPM8			PER2
AMPD2			CD1D
AKT2			CD5L
GDA			MSC
CCNC			KL
HSD11B2			IKBKE
PLCG1			LPIN2
PIN4			RAPGEF5
MAX			BMS1
CACNA1D			IP6K1
PPID			MED13
PLA2G2E			ADA
CHRM4			C20orf181
CHRM2			CD24
REN			BCL2L11
CHRM3			MIR1275
CACNB1			AAA1
PTPRB			DNM1L
CACNA1A			BED
PPIG			TOB1
PLA2G2F			SORBS3
ACACB			CDK6
METAP1			PRG4
TLR8			AP3S2
NCOA1			CDKN1A
RIPK1			CBSL
NR5A1			CDKN2B
GALR1			HMG20A
PPIA			CEACAM5
GRM2			LARP1BP2
ELANE			RNU6-392P
GPR55			CCL27
ACVRL1			HPSE
PDGFRA			NPFFR2
MAP3K7			GPR83
MAP2K6			MTMR11
APOBEC3G			SLC27A2
INSR			ADCY5
PIK3CG			NUDT3
MRP3			CHIT1
PTPN9			PRRT2
TNNC1			CHRM2
TNNI3			CHRNA2
TNNT2			CHRNA3
PTPN22			CHRNA5
PTPN13			ADCY8
IGF2R			UCN3
TLR9			CHRNB4
KCNA3			C1QTNF1
			THEM4
			ANTXR2
			CLU
			CCR5
			COL6A3
			RBM45
			COMP
			COPA
			COX4I1
			CP
			CPT1B
			CRABP1
			CREB1
			CREM
			FUNDC1
			CRY1
			HT
			CSF1R
			IL34
			CCN2
			CTSK
			CCDC80
			CUX1
			CYP1A1
			CYP1A2
			CYP2A6
			LINC00689
			CYP2B6
			CYP2B7P
			CBLL2
			CYP27A1
			DAG1
			DBI
			SGMS2
			ACAN
			ATN1
			RCAN1
			TSC22D3
			DSPP
			DUSP1
			EGR1
			AIF1
			ELANE
			CRTC2
			ENPEP
			PRSS55
			EPAS1
			ERG
			ERN1
			FBL
			F13A1
			ALDH2
			PTK2B
			FCGR2B
			FDXR
			GPC4
			FGB
			FGF2
			FGF5
			FGF10
			FGF13
			FGL1
			FKBP4
			ATF6
			NT5C2
			KDM4B
			FOXM1
			ZNF423
			FLT1
			RRS1
			FMO3
			NEDD4L
			CRTC1
			PADI4
			SMUG1
			DAPK2
			PPP1R15A
			PLA2G15
			CADM1
			ALOX5AP
			PANX1
			ZNF318
			G6PC
			BRWD3
			GABRA2
			BAMBI
			ASPM
			PTPN22
			AMD1
			GEM
			GFAP
			GFER
			HAVCR1
			GJA1
			AMPD1
			GJA4
			ACAD8
			GK
			GLB1
			SGSM3
			GLO1
			GNRHR
			GPD1
			CXCR3
			HCCAT5
			METRNL
			LPAR4
			GPER1
			RGMB
			SLC27A6
			SCG3
			CD274
			GSTP1
			REPIN1
			NPC1L1
			ANXA1
			H2AX
			ANXA2
			HFE
			HHEX
			HOXD13
			HSF1
			HSPA2
			HSPG2
			TNC
			C1QTNF9
			IDE
			IFNB1
			APOD
			IGFALS
			IKBKB
			IL13
			ING2
			ISL1
			EIF6
			JAK3
			GSTK1
			MALAT1
			KISS1
			KRT7
			KRT18
			RTL1
			LCAT
			LINC01194
			MIR107
			MIR10B
			MIR141
			MIR152
			MIR15B
			MIR200B
			MIR222
			MIR23A
			MIR29A
			MIR32
			MIR96
			SMAD2
			MAF
			MAS1
			MC1R
			MC5R
			DNAJB9
			MDK
			MFAP2
			ASCL1
			MMP14
			EIF2AK4
			MIR342
			ASPA
			PLF
			RNR1
			MUSK
			ATF3
			NFATC3
			NFE2L1
			NGF
			NNAT
			NOS2
			NPPA
			MIR425
			ATP5F1A
			ORM1
			PAEP
			REG3A
			SERPINA5
			ABHD5
			HSPA14
			DNAJC27
			TNFRSF12A
			IL23A
			KLF13
			ENPP2
			LUC7L3
			PECAM1
			PER1
			PFKP
			PGC
			PGF
			SERPINA1
			PIN1
			PKM
			PLA2G4A
			PLAG1
			PLAT
			TM6SF2
			PLTP
			PTOV1
			PON3
			APPL2
			QRSL1
			LGR4
			PRCP
			PREP
			SLC30A10
			PRKCA
			SELENOS
			ACSS2
			MYDGF
			MAPK10
			MAP2K3
			PROC
			PROS1
			METTL3
			CCL28
			TMPRSS15
			SUCNR1
			ATP10D
			ABHD6
			MIR519D
			ARHGAP21
			CFAP97
			PTPN2
			IL21
			RAPSN
			GER
			SENP2
			RGS2
			BDKRB2
			S100A8
			S100B
			SAA2
			ACSM3
			BGN
			CCL11
			CCL19
			CCL20
			THADA
			SELP
			SELPLG
			XYLT2
			CARD9
			SETMAR
			SFRP1
			HHIP
			PYY3
			SHC1
			CERK
			P2RY12
			IL25
			BMP2
			PINK1
			SLC2A2
			SLC6A2
			NCF1
			SLC15A1
			BMPR1A
			SLN
			SNRNP70
			SOD3
			SORL1
			MAP3K7
			TAL1
			TAZ
			TBX15
			MIR532
			TCF21
			TEK
			TERF1
			THBD
			THRB
			THRSP
			TIMP1
			TIMP3
			C1QBP
			TPH1
			CRISP2
			C3AR1
			TRH
			TRPC1
			TRPM2
			TNFRSF4
			PLIN4
			TYRP1
			UCN
			UROD
			USF1
			VIM
			VIP
			WFS1
			XRCC1
			CXCR4
			VKORC1
			METRN
			PRRC2A
			PLA2G7
			MUL1
			DHX40
			ADM2
			WDR26
			FLAD1
			AAAS
			TLR10
			TAM
			CAST
			CASP3
			ROPN1L
			PLA2G6
			SGIP1
			ATRN
			IL1F10
			SPZ1
			ACCS
			DGKE
			TNFSF11
			KLF7
			TNKS
			TNFSF14
			TNFSF10
			CBS
			SOCS2
			CCN5
			KAT2B
			SPHK1
			ARTN
			CCT
			CLDN10
			SLC39A13
			NLRP12
			NOG
			CD8A
			KLF4
			SLIT2
			PPIG
			SLC22A8
			LIPG
			ATG5
			MAGED1
			LITAF
			TBPL1
			NPEPPS
			GDF3
			ABCG1
			RGS6
			KEAP1
			DNAJC6
			TBC1D4
			MVP
			CDH2
			AKT3
			MIR675
			TANK
			ZSCAN30
			VTRNA2-1
			MIR374B
			MUPP
			HDAC6
			DIP
			ENDO1
			IBD20
			INSL5
			WAGRO
			BOP
			MIR1908
			TMED7-TICAM2
			CHAF1A
			PARP2
			GJC1
			LY75-CD302
			TMX2-CTNND1
			DEL11P13
			KLRC4-KLRK1
			COMMD3-BMI1
			ABCC5
			MIR4777
			MIR4460
			MIR4443
			MIR4517
			BIRC6-AS1
			CDH11
			PPIF
			PGR-AS1
			OPN1MW3
			LSINCT5
			BCAP31
			FAM13A
			TRIM28
			WASF2
			DHRS9
			RBM6
			LINC01412
			MACORIS
			RNF41
			CDK5
			CALCRL
			ANGPTL7
			TRIB1
			PLIN3
			RCAN2
			CDK8
			SPRY1
			IRX5
			RAMP2
			RAMP3
			LOC102724197
			LOC102724971
			RTN3
			AKR1A1
			KLF2
			CITED2
			CEPT1
			PEMT
			PIAS3
			YAP1
			ERICD
			IFI30
			OLFM1
			CDX2
			TOMM40
			MAD2L2
			TIMM44
			SLC9A6
			NCOA2
			SEMA4D
			CEBPB
			SEMA3C
			CEBPD
			KAT5
			HYOU1
			ZNRD2
			THRA1/BTR
			LINC00237
			PRDX4
			ARL6IP5
			AGPAT2
			SLC35A1
			OLFM4
			DPYSL4
			LRP1-AS
			TXNRD2
			SCGN
			RGS14
			CAMKK2
			CST12P
			RN7SL263P
			CELF1
			SIRT1-AS
			CGRRF1
			DCTN6
			GNA13
			TNFSF13B
			CETN1
			POLD3
			ORI6
			OGA
			NFAT5
			NES
			CFTR
			SEPTIN9
			CCR9
			WASF3
			PPP1R13L
			LILRB1
			ADAM28
			USP19
			CEACAM8
			MRPS30
			UTS2
			PAPOLA
			PRDX3
			FERMT2
			SDS
			SLC27A5
			SLC27A4
			RIPK3
			CHD2
			RAPGEF4
			STIN2-VNTR
			ADAMTS5
			PRDM4
			CHEK1
			WDHD1
			MAP4K5
			IRAK3
			AKAP13
			KLHL2
			VSIG4
			PDAP1
			TUSC2
			OIP5
			SYNPO
			CHRNA4
			DBA2
			TXNRD3
			SORCS1
			OSBPL11
			C1QTNF3
			C1QTNF7
			HAUS1
			H3P23
			H3P10
			SLC5A11
			ADCYAP1
			SLC22A12
			ABHD15
			LRG1
			AGAP2
			FTSJ3
			RLN3
			TWIST2
			CLCN3
			MSS51
			CLCN7
			GSTO2
			CLK2
			CLN3
			CLTA
			TPH2
			CMA1
			SPPL3
			CCR6
			CCR7
			ACKR2
			IQCK
			ZNF543
			CPT1C
			COL1A1
			OSCP1
			COL4A1
			COL6A1
			COL9A3
			COL12A1
			CORT
			SLCO6A1
			ADORA1
			TAAR1
			ADORA2A
			ADORA2B
			KLF14
			CPN1
			CPN2
			GPAT4
			MAGEC3
			CRHR2
			MAGEE2
			ADORA3
			CRMP1
			S100A16
			TRIM69
			MACROD2
			CRY2
			CSE1L
			PIWIL4
			CSF2
			CSF3
			CSK
			CDAN1
			CSTA
			LYPD4
			TICAM1
			CILP2
			ATP8B3
			CREB3L4
			HJV
			PM20D1
			CTNND1
			PHETA2
			CTRL
			CTSB
			PLB1
			ZNF385B
			ERFE
			CTSL
			XXYLT1
			CNTN4
			PAQR3
			CREBRF
			SLC2A12
			VKORC1L1
			KCTD7
			CYP2C9
			CYP2D7
			CYP2D6
			CYP3A4
			CYP11A1
			CYP17A1
			CYP21A2
			CYP24A1
			SLC35G1
			CYP27B1
			DACH1
			DAPK3
			MARCHF10
			AKR1C2
			TMPRSS6
			AAVS1
			NLRP6
			DIH1
			DIO1
			DNAH8
			DOCK2
			DPT
			DRD5
			DUSP5
			DUSP9
			E2F1
			ECT2
			EDNRB
			PGAM5
			EIF2S1
			DCP1B
			ARID2
			METTL21C
			MLKL
			EIF4E
			EIF4EBP2
			ELAVL2
			A2M
			PIKFYVE
			SPRED2
			CRYBG1
			TAPT1
			ENO2
			CCDC171
			ERBB4
			ERCC2
			ERCC4
			ESRRB
			ETFA
			ETV3
			EZH2
			F2R
			F2RL2
			F9
			F10
			F11
			FABP3
			FANCB
			MTIF3
			FAT2
			TMEM26
			FCGR1A
			MARCHF8
			FCGR3A
			PHACTR1
			HOXA11-AS
			THSD7A
			FDFT1
			FDPS
			FES
			VASH1
			MLXIP
			ALDOB
			KLRK1
			RAB18
			FOXC1
			WDTC1
			CAND2
			KDM4C
			KDM6B
			FLNA
			GPD1L
			PASK
			FLNC
			NBEAL2
			FLT3
			SIK2
			PHLPP1
			PSD3
			SIK3
			DICER1
			SIRT5
			SIRT4
			NCS1
			MLYCD
			TARDBP
			OTP
			TRAM1
			SEC14L2
			DDAH2
			FPR2
			AMACR
			MKRN1
			LY96
			DIANPH
			ALOX15
			PELI3
			IL27
			FSHB
			ALPL
			FYN
			ANGPTL5
			SLC37A4
			GABPB1
			NPNT
			TCERG1L
			GCA
			SPDEF
			TAFA5
			GALE
			PRDX5
			MOB4
			GALR1
			POC1A
			AMBP
			GALNT2
			SGMS1
			GEMIN5
			EGFL6
			SNED1
			GORASP2
			ZZZ3
			ACOT11
			IS1
			DNM3
			CFAP61
			KIFBP
			GATA2
			FBXO3
			GCH1
			NUPR1
			OPN1MW
			GCY
			GDF2
			GDF10
			TAS2R12P
			HCA1
			NAP1L5
			GFI1
			GH2
			FETUB
			GJA3
			NPTN
			GJA8
			MLH3
[truncated: 1,029 more rows]
