# Supplementary figures and images for: Elucidation of Prebiotics, Probiotics, Postbiotics, and Target from Gut Microbiota to Alleviate Obesity via Network Pharmacology Study
Source: MDPI journal article supplement (doi:10.3390/cells11182903), 2022-09-16

Supplementary Figure S1. The PPI networks (337 nodes and 4492 edges).

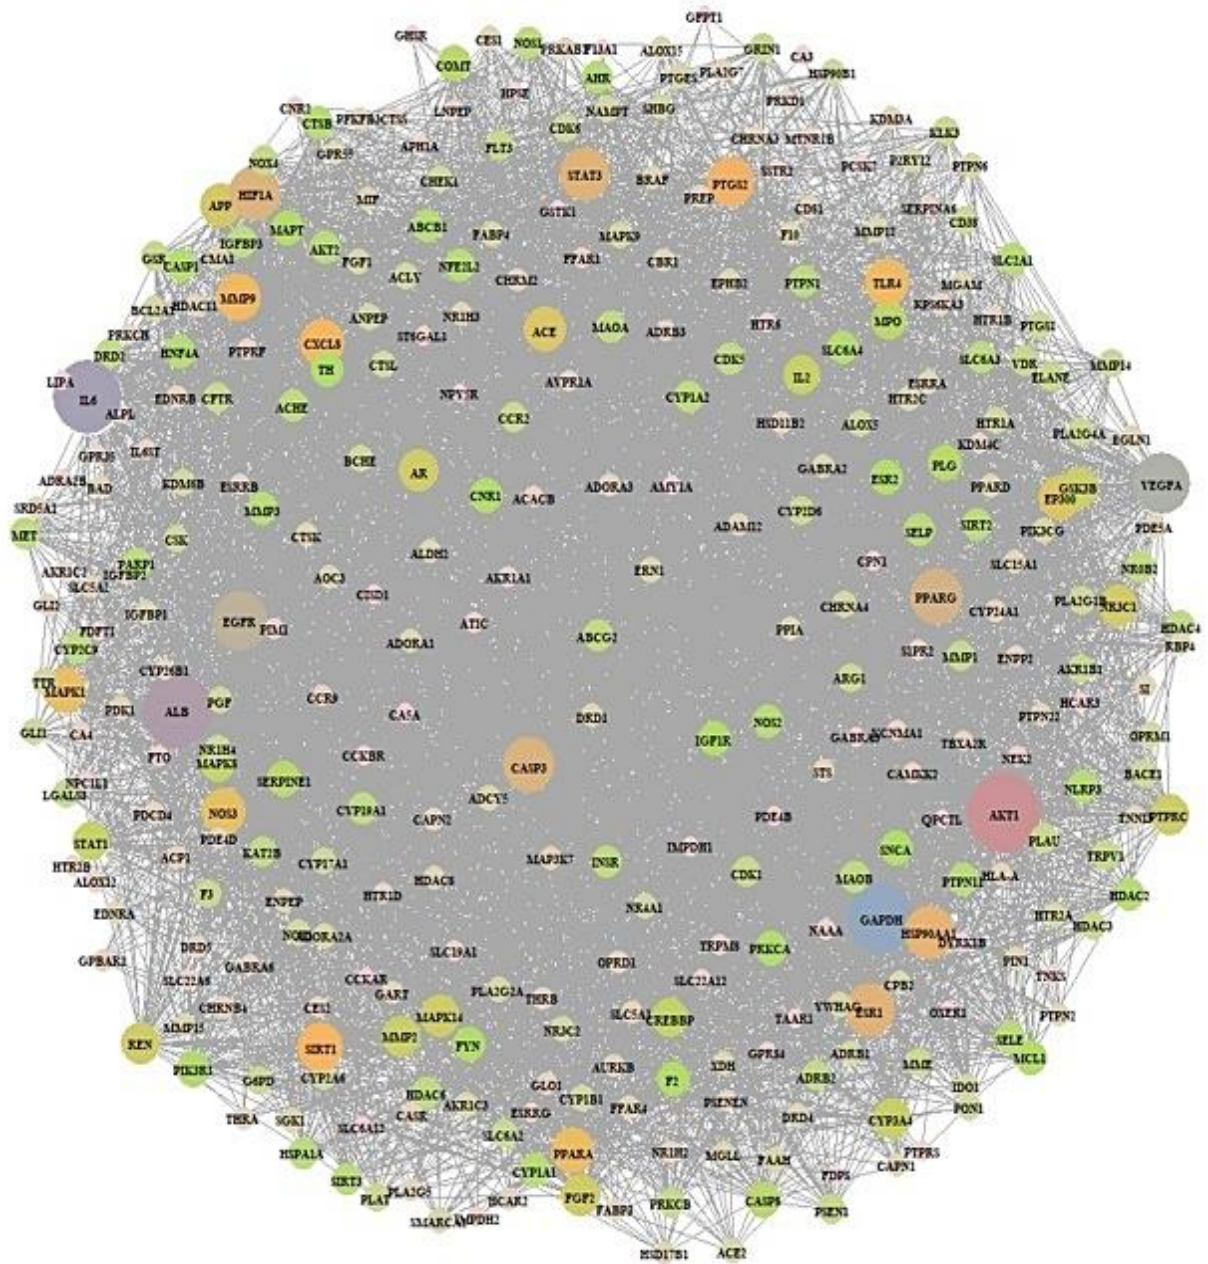

Supplement: s1 [file s1]

**Supplementary Figure S2.** The PPI networks (106 nodes and 1441 edges) of upper 30% DC value from Figure S1.

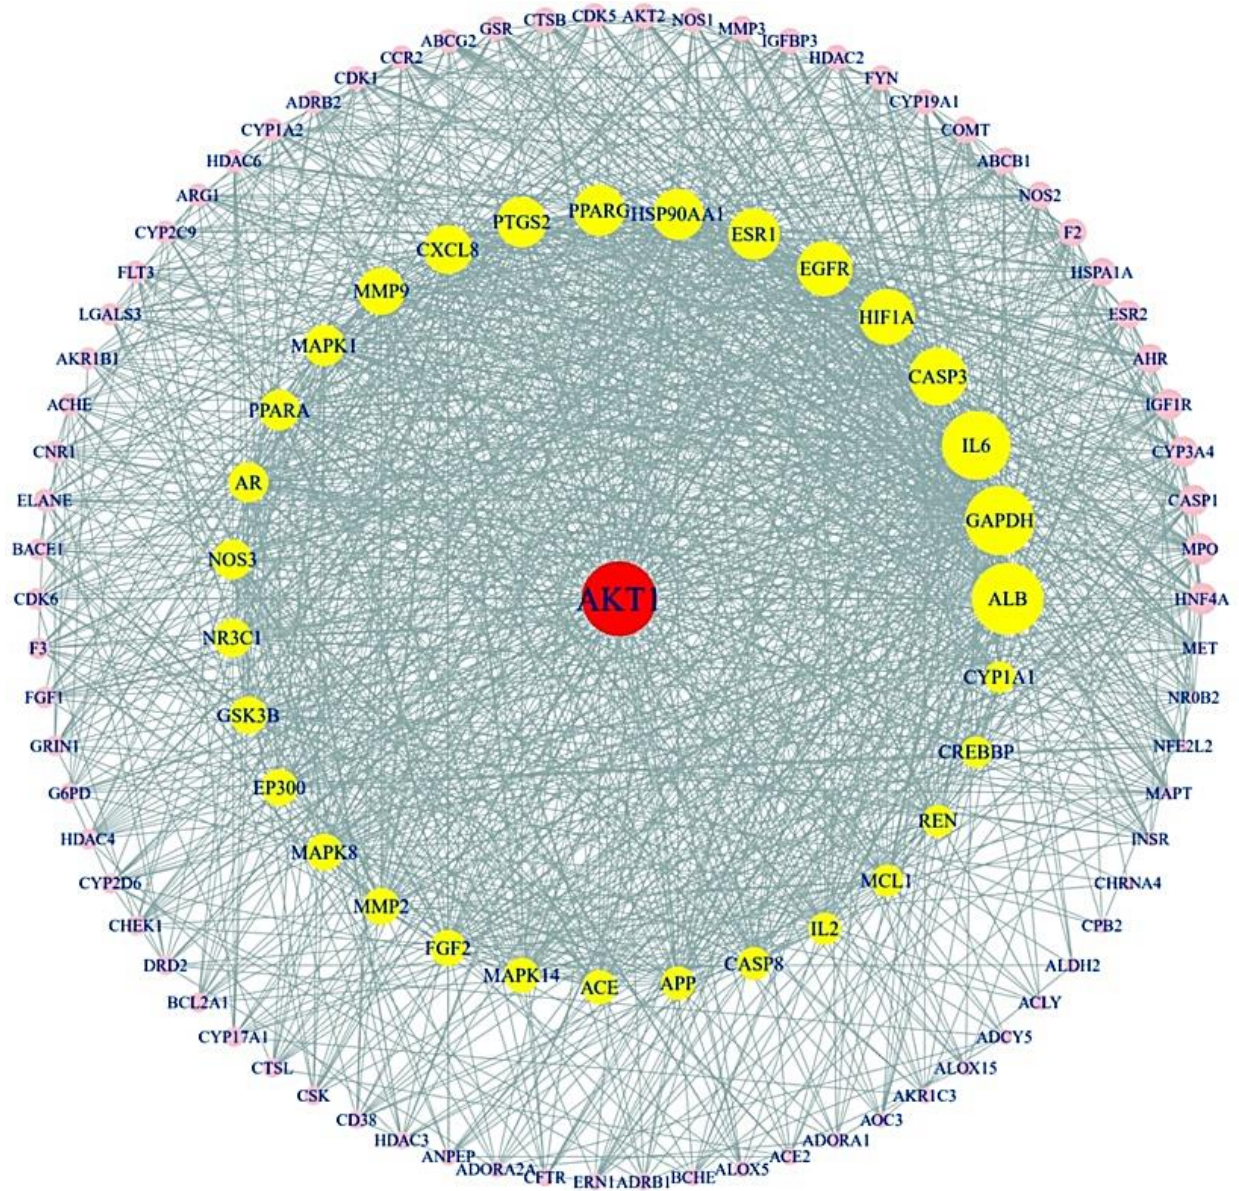

Supplement: s1 [file s1]
